# Supplementary material for: Crossing the Digital Divide in Online Self-Management Support: Analysis of Usage Data From HeLP-Diabetes
Source: PubMed Central journal article supplement (PMC6303008; doi:10.2196/10925), 2018-12-06
Supplement: diabetes_v3i4e10925_app2.pdf [file diabetes_v3i4e10925_app2.pdf]

## Appendix 2

Total number of visits to each section of the HeLP-Diabetes website by users of different education levels

| <b>Website section</b>                          | <b>School leaver</b> | <b>A-level</b> | <b>Degree or NVQ4</b> | <b>Post Grad or NVQ5</b> | <b><i>p</i></b> |
|-------------------------------------------------|----------------------|----------------|-----------------------|--------------------------|-----------------|
| Forum and help                                  | 233                  | 52             | 135                   | 66                       | 0.30            |
| Homepage                                        | 287                  | 188            | 283                   | 144                      | 0.96            |
| Living and working with diabetes                | 193                  | 92             | 106                   | 27                       | 0.03            |
| Managing my feelings                            | 61                   | 45             | 82                    | 43                       | 0.22            |
| Miscellaneous articles                          | 45                   | 47             | 77                    | 24                       | 0.95            |
| My health records                               | 256                  | 287            | 428                   | 279                      | 0.54            |
| News and research                               | 50                   | 22             | 24                    | 41                       | 0.59            |
| Profile, admin, login, logout or register pages | 350                  | 178            | 285                   | 122                      | 0.79            |
| HeLP-Diabetes: Starting Out                     | 248                  | 165            | 341                   | 125                      | 0.71            |
| Staying Healthy                                 | 466                  | 201            | 297                   | 154                      | 0.32            |
| Treating Diabetes                               | 115                  | 30             | 129                   | 71                       | 0.04            |
| Understanding Diabetes                          | 251                  | 225            | 234                   | 67                       | 0.93            |
